# Supplementary material for: A Comparative Analysis of Eating Behavior of School-Aged Children with Eosinophilic Esophagitis and Their Caregivers' Quality of Life: Perspectives of Caregivers
Source: Springer Nature journal article supplement (doi:10.1007/s00455-019-09984-x), 2019-02-02
Supplement: MOESM1 [file 16439348]

**Supplementary Table 1: Child’s eating behavior as observed by their caregiver’s**

|  | **Non-Eosinophilic esophagitis Controls**  **(N=38)** | | **Eosinophilic esophagitis**  **(N=42)** | |
| --- | --- | --- | --- | --- |
|  | **Not often** | **Often** | **Not often** | **Often** | |
| **Food approach traits, [Number (%)]** |  |  |  |  | |
| Food responsiveness | 29 (76) | 9 (24) | 30 (71) | 11 (29) | |
| Enjoyment of food | 11 (29) | 27 (71) | 14 (33) | 28 (67) | |
| Emotional overeating | 34 (89) | 4 (11) | 40 (95) | 2 (5) | |
| Desire to drink | 25 (66) | 13 (34) | 18 (43) | 24 (57) | |
|  |  |  |  |  | |
| **Food avoidant traits, [Number (%)]** |  |  |  |  | |
| Satiety responsiveness | 19 (50) | 19 (50) | 24 (57) | 18 (43) | |
| Slowness in eating | 29 (76) | 9 (24) | 34 (81) | 8 (19) | |
| Emotional undereating | 29 (76) | 9 (24) | 29 (69) | 13 (31) | |
| Food fussiness | 25 (66) | 13 (34) | 29 (69) | 13 (31) | |

**Supplementary Table 2: Comparing the proportion of caregivers of children enrolled**

|  | **Non-Eosinophilic esophagitis Controls**  **(N=38)** | | **Eosinophilic esophagitis**  **(N=42)** | |
| --- | --- | --- | --- | --- |
|  | **Less than or equal to half the time** | **More than half the time** | **Less than or equal to half the time** | **More than half the time** |
| In the past **ONE** month, as a result of your child's feeding/swallowing problems, how often have you had **problems carrying out your daily activities**?**[Number (%)]** | | |  |  |
| It is hard for me to do my job, go to school, or work around the house | 38 (100) | -- | 42 (100) | -- |
| It is hard for me to get help from others because they are scared to feed or take care of my child. | 34 (89) | 4 (11) | 29 (69) | 13 (31) * |
| It is hard for me to leave my child because I am scared to have other people feed or take care of my child. | 33 (87) | 5 (13) | 30 (71) | 12 (29) |
| It is hard for my family to make plans or go out to eat. | 30 (79) | 8 (21) | 24 (57) | 18 (43) * |
| I am too tired to do the things I want or need to do. | 34 (89) | 4 (11) | 32 (76) | 10 (24) |
|  |  |  |  |  |
| In the past **ONE** month, as a result of your child's feeding/swallowing problems, how often have you had **problems with worrying**?**[Number (%)]** | | |  |  |
| I worry about my child's general health. | 26 (68) | 12 (32) | 19 (45) | 23 (55) * |
| I worry that my child does not get enough to eat or drink. | 30 (79) | 8 (21) | 28 (67) | 14 (33) |
| I worry about how others will react to my child's feeding/ swallowing problems. | 31 (82) | 7 (18) | 31 (74) | 11 (26) |
| I worry about how my child breathes when feeding and whether my child will choke. | 34 (89) | 4 (11) | 35 (83) | 7 (17) |
| I worry that my child will never eat and drink like other children. | 34 (89) | 4 (11) | 29 (69) | 13 (31) * |
| I worry about whether I am doing enough to help with my child’s feeding /swallowing problems. | 29 (76) | 9 (24) | 27 (64) | 15 (36) |
| I worry about how my child’s feeding/ swallowing problems affect others in my family. | 33 (87) | 5 (13) | 33 (79) | 9 (21) |
|  |  |  |  |  |
| In the past **ONE** month, as a result of your child's feeding/swallowing problems, how often have you had **problems feeding your child**?**[Number (%)]** | | |  |  |
| It is hard to feed my child because it takes a long time to prepare liquids and foods the "right" way. | 35 (92) | 3 (8) | 34 (81) | 8 (19) |
| It is hard to feed my child because I don't know how to prepare liquids and foods. | 35 (92) | 3 (8) | 34 (81) | 8 (19) |
| It is hard to feed my child because others give my child liquids or foods that are not allowed. | 35 (92) | 3 (8) | 37 (88) | 5 (12) |
| It is hard to feed my child because I don't know how long these problems will last. | 32 (84) | 6 (16) | 32 (76) | 10 (24) |
| It is hard to feed my child because family members or professionals have different opinions about taking care of my child’s feeding/swallowing problems. | 34 (89) | 4 (11) | 33 (79) | 9 (21) |
| It is hard to feed my child because I do not get enough information about how to get my child to eat and drink like other children. | 35 (92) | 3 (8) | 37 (88) | 5 (12) |
|  |  |  |  |  |

* Chi-squared test; *p* value ≤ 0.05
